# Supplementary material for: Gomisin N Alleviates Ethanol-Induced Liver Injury through Ameliorating Lipid Metabolism and Oxidative Stress
Source: PubMed Central journal article supplement (PMC6164513; doi:10.3390/ijms19092601), 2018-09-01
Supplement: ijms-19-02601-s001.pdf [file ijms-19-02601-s001.pdf]

## Supplementary Table S1. qPCR primers list

### Human

| Gene           | Forward primer           | Reverse primer              |
|----------------|--------------------------|-----------------------------|
| hSREBP1c       | CGGAGCCATGGATTGCACT      | TAGGCCAGGGAAGTCACTG         |
| hCYP2E1        | AGCAGATTTCTGGGAGCCTCAGTT | AGTGGAAGTGTGACTTGGAGCTGT    |
| hFAS           | TCGTGGGCTACAGCATGGT      | GCCCTCTGAAGTCGAAGAAGAA      |
| hSCD1          | CCAGTCAACTCCTCGCACTT     | AGCCAGGTTTGTAGTACCTCC       |
| hPPAR $\alpha$ | GGACAGCAAATCTTGAAGCAGC   | CTCTGATCCCTCTAGCACCTT       |
| hCPT1          | TTTCCTTGCTGAGGTGCTCT     | TCTCGCCTGCAATCATGTAG        |
| hACO           | TCCTGCCACCTTGCTICAC      | TTGGGGCCGATGTCACCAAC        |
| hCAT           | GAAGTGTCCCTACCGTGCTCGA   | CCAGAATATTGGATGCTGTGCTCCAGG |
| hSOD           | AATGGACCAGTGAAGGTGTGGGG  | CACATTGCCCAAGTCTCCAACATGC   |
| hGPX           | CGGCCAGTCGGTGTATGC       | CGTGGTGCCTCAGAGGGAC         |
| hTNF- $\alpha$ | TGCTTGTTCCCTCAGCCTCTT    | ATGGGCTACAGGCTTGTCACT       |
| hIL-6          | ACTCACCTCTTCAGAACGAATTG  | CCATCTTTGGAAGGTTTCAGGTTG    |
| hMCP-1         | CCCCAGTCACCTGCTGTTAT     | TGGAATCCTGAACCCACTTC        |
| hm18s          | CGGCTACCACATCCAAGGAA     | GCTGGAATTACCGCGGCT          |

## Mouse

| Gene           | Forward primer              | Reverse primer              |
|----------------|-----------------------------|-----------------------------|
| mSREBP1c       | GGAGCCATGGATTGCACATT        | GGCCCGGGAAGTCACTGT          |
| mCYP2E1        | CTTTGCAGGAACAGAGACCA        | ATGCACTACAGCGTCCATGT        |
| mFAS           | AGG TGG TGA TAG CCG GTA TGT | TGG GTA ATC CAT AGA GCC CAG |
| mSCD1          | CTGTACGGGATCATACTGGTTC      | GCCGTGCCTTGTAAGTTCTG        |
| mPPAR $\alpha$ | AGCTGGTGTAGCAAGTGT          | TCTGCTTTCAGTTTTGCTTT        |
| mCPT1          | ACTCCTGGAAGAAGAAGTTCA       | AGTATCTTTGACAGCTGGGAC       |
| mACO           | TGTTAAGAAGAGTGCCACCAT       | ATCCATCTCTTCATAACCAAATTT    |
| mCAT           | TGAGAAGCCTAAGAACGCAATTC     | \CCCTTCGCAGCCATGTG          |
| mSOD           | CCAGTGCAGGACCTCATTTT        | GTTTACTGCGCAATCCCAAT        |
| mGPX           | CCACCGTGTATGCCTTCTCC        | GATCGTGGTGCCTCAGAGAG        |
| mTNF- $\alpha$ | CCCTCACACTCAGATCATCTTCT     | GCTACGACGTGGGCTACAG         |
| mIL-6          | TAGTCCTTCCTACCCCAATTTCC     | TTGGTCCTTAGCCACTCCTTC       |
| mMCP-1         | GCATCCACGTGTTGGCTCA         | CTCCAGCCTACTCATTGGGATCA     |
| hm18s          | CGGCTACCACATCCAAGGAA        | GCTGGAATTACCGCGGCT          |

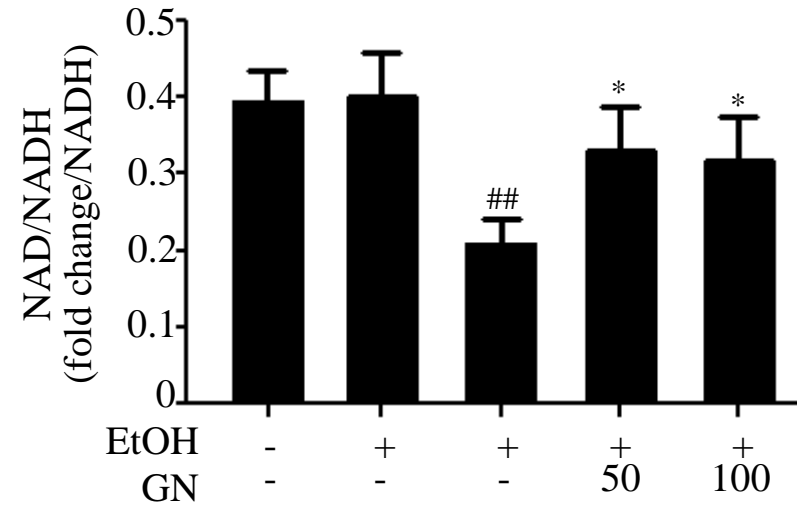

**Supplementary Figure S1. Gomisin N reverses ethanol-mediated reduction in NAD<sup>+</sup>/NADH ratio in SK-HEP-1 cells.** SK-HEP-1 cells were treated with 50 mM ethanol in the presence or absence of GN (50  $\mu$ M or 100  $\mu$ M) for 24 h. The NAD<sup>+</sup>/NADH ratio in SK-HEP-1 cells was measured with the NAD<sup>+</sup>/NADH quantification kit according to the manufacturer's instructions. Values are the mean  $\pm$  SD of triplicate experiments. ## $p$ <0.01 vs. untreated control, \* $p$ <0.05 vs. ethanol-treated group.

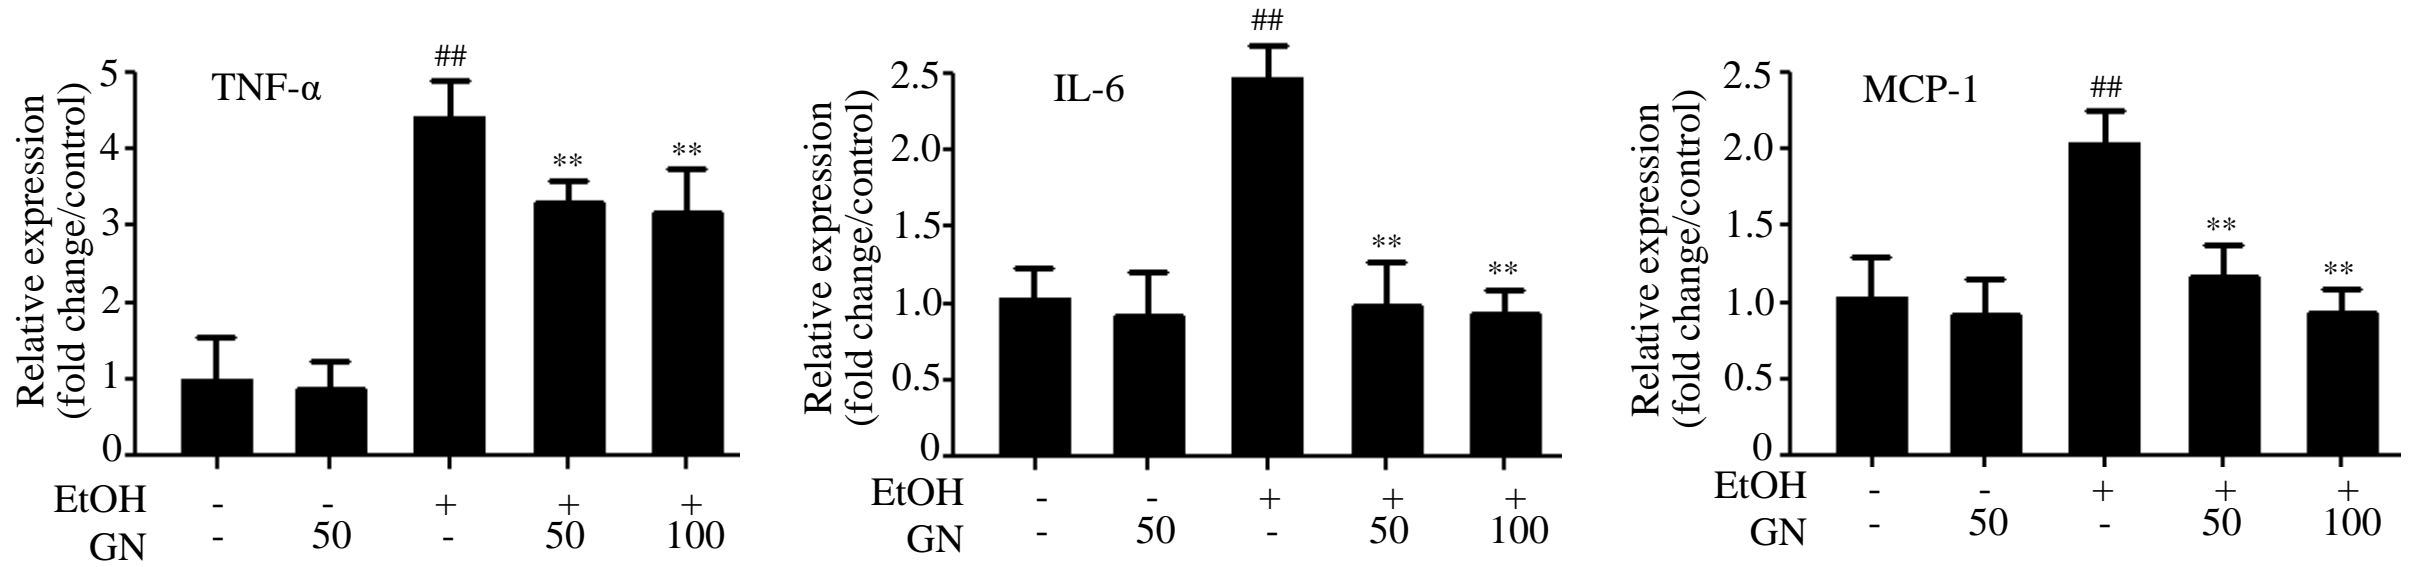

**Supplementary Figure S2. Gomisin N decreases ethanol-induced inflammation gene expression in SK-HEP-1 cells.**

SK-HEP-1 cells were treated with 50 mM ethanol in the presence or absence of GN (50 μM or 100 μM) for 24 h. The expressions of *hTNF-α*, *hIL-6*, and *hMCP-1* were analysed by qPCR. Values are the mean±SD of triplicate experiments.

## $p < 0.01$  vs. untreated control, \*\* $p < 0.01$  vs. ethanol-treated group.
